# Supplementary material for: The N-Terminal GYPSY Motif Is Required for Pilin-Specific Sortase SrtC1 Functionality in Lactobacillus rhamnosus Strain GG
Source: PubMed Central journal article supplement (PMC4829219; doi:10.1371/journal.pone.0153373), 2016-04-12

# Panel A

| Species                                         | Strain                  | Gene Name         | Sequence                                                                                                                                                                                                                                                                       |
|-------------------------------------------------|-------------------------|-------------------|--------------------------------------------------------------------------------------------------------------------------------------------------------------------------------------------------------------------------------------------------------------------------------|
| <i>Paenibacillus borealis</i>                   | DSM 13188               | PBOR_03375        | MRKLSYLI ILA <b>GV</b> LIMLYPKGSEWYNDRQQQKLLLEEAEQAYSEIVP SASAPAGADLSKPY                                                                                                                                                                                                       |
| <i>Paenibacillus sp.</i>                        | FSL P4-0081             | P40081_03675      | MRKLSYLI ILA <b>GV</b> LIMLYPKGSEWYNDRQQQKLLLEEAEQAYSEIVP SASAPASADLSKPY                                                                                                                                                                                                       |
| <i>Paenibacillus sp.</i>                        | FSL R5-0912             | R50912_03350      | MRKLSYLI ILA <b>GV</b> LIMLYPKGSEWYNDRQQQKLLLEEAEQAYSEIVP SASAPASADLSKPY                                                                                                                                                                                                       |
| <i>Paenibacillus sp.</i>                        | FSL R7-0273             | R70723_02905      | MRKLSYLI ILA <b>GV</b> LIMLYPKGSEWYNDRQQAKLLEEAEQAYSELAPAPGPDLOKPYAEVT                                                                                                                                                                                                         |
| <i>Paenibacillus sp.</i>                        | FSL H7-0357             | H70357_03230      | MRKFSYLI IIA <b>GV</b> LVMLYPKGSEWYNDRQQEKLLKEAEQAYSELAPSSPEPDLKKQYAEVT                                                                                                                                                                                                        |
| <i>Streptococcus pyogenes</i>                   | MGAS10750 (serotype M4) | MGAS10750_Spy0118 | MKKQSKRHRNLQNIALIVVFLI <b>GLT</b> ILLYPQISRIYYTIESNYQSKQFDREKSTLHQEDI                                                                                                                                                                                                          |
| <i>Streptococcus pyogenes</i>                   | MGAS10750 (serotype M4) | MGAS10750_Spy0119 | MLKKNQSLSLRERLIQVMFPLLFLMG <b>CLIV</b> LYPLMSNYYRVKQNAVTSFESAKVIVNK                                                                                                                                                                                                            |
| <i>Streptococcus pneumoniae</i>                 | Hungary19A 6            | SPH_0576          | MVKTKKQKRNNLLGCVVFFI <b>GM</b> AVMAYPLVSRLYRVE SNQQIADFDKEKATLDEADIDE                                                                                                                                                                                                          |
| <i>Streptococcus pneumoniae</i>                 | Hungary19A 6            | SPH_0577          | MDNSRRSRKKGTKKKKHPILLIIFLV <b>GF</b> AVAIYPLVSRYYYRIESNEVIKEFDETVSQM                                                                                                                                                                                                           |
| <i>Streptococcus pneumoniae</i>                 | Taiwan19F-14            | SPT_0505          | MAKTKKQKRNNLLGCVVFFI <b>GM</b> AVMAYPLVSRLYRVE SNQQIADFDKEKATLDEADIDE                                                                                                                                                                                                          |
| <i>Streptococcus pneumoniae</i>                 | Taiwan19F-14            | SPT_0506          | MV <b>GL</b> AVAMYPLVSRYYYRIESNEVIKEFDETVSQMDKAEERWRLAQAFNATLKPSEIL                                                                                                                                                                                                            |
| <i>Streptococcus pneumoniae</i>                 | TCH8431/19A             | HMPREF0837_10762  | MAKTKKQKRNNLLGCVVFFI <b>GM</b> AVMAYPLVSRLYRVE SNQQIADFDKEKATLDEADIDE                                                                                                                                                                                                          |
| <i>Streptococcus pneumoniae</i>                 | TCH8431/19A             | HMPREF0837_10763  | MSKRSYRKKSVKKKKNPFI <b>LL</b> IFLV <b>GL</b> AVAMYPLVSRYYYRIESNEVIKEFDETVSQM                                                                                                                                                                                                   |
| <i>Streptococcus pneumoniae</i>                 | 670-6B                  | SP670_0544        | MVTKKQKRNNLLGCVVFFI <b>GM</b> AVMAYPLVSRLYRVE SNQQIADFDKEKATLDEADIDE                                                                                                                                                                                                           |
| <i>Streptococcus pneumoniae</i>                 | ST556                   | MYY_0537          | MKKKKNPFI <b>LL</b> IFLV <b>GL</b> AVAMYPLVSRYYYRIESNEVIKEFDETVSQMDKAEERWRL                                                                                                                                                                                                    |
| <i>Streptococcus pneumoniae</i>                 | A026                    | T308_02250        | MAKTKKQKRNNLLGCVVFFI <b>GM</b> AVMAYPLVSRLYRVE SNQQIADFDKEKATLDEADIDE                                                                                                                                                                                                          |
| <i>Streptococcus pneumoniae</i>                 | A026                    | T308_02255        | MSKRSYRKKSVKKKKNPFI <b>LL</b> IFLV <b>GL</b> AVAMYPLVSRYYYRIESNEVIKEFDETVSQM                                                                                                                                                                                                   |
| <i>Streptococcus agalactiae</i>                 | 2603 (serotype V)       | SAG1405           | MGGK <b>FQ</b> KNLKKSVVLRNRMNVGLI <b>LL</b> FLV <b>GLL</b> ITSY <b>PF</b> IS <b>NW</b> YNIKANNQVTFNFDNQ <b>TQ</b>                                                                                                                                                              |
| <i>Streptococcus agalactiae</i>                 | 2603 (serotype V)       | SAG1406           | MKTKKI IKKTKKKKSNL <b>PF</b> I <b>LL</b> FLI <b>GLS</b> ILLYPVVSR <b>FY</b> YTI <b>ES</b> NNQ <b>TQ</b> DFERAAK <b>LSQ</b>                                                                                                                                                     |
| <i>Streptococcus agalactiae</i>                 | 09mas018883             | BSA_14860         | MGGK <b>FQ</b> KNLKKSVVLRNRMNVGLI <b>LL</b> FLV <b>GLL</b> ITSY <b>PF</b> IS <b>NW</b> YNIKANNQVTFNFDNQ <b>TQ</b>                                                                                                                                                              |
| <i>Streptococcus agalactiae</i>                 | 09mas018883             | BSA_14870         | MKTKNIN <b>KK</b> TKKKSNL <b>PF</b> I <b>LL</b> FLI <b>GLS</b> ILLYPVVSR <b>FY</b> YTI <b>ES</b> NNQ <b>TQ</b> DFERAAK <b>LSQ</b>                                                                                                                                              |
| <i>Streptococcus agalactiae</i>                 | NGBS061                 | EN72_07795        | MGG <b>R</b> <b>FQ</b> KNLKKSVVLRNRMNVGLI <b>LL</b> FLV <b>GLL</b> ITSY <b>PF</b> IS <b>NW</b> YNIKANNQVTFNFDNQ <b>TQ</b>                                                                                                                                                      |
| <i>Streptococcus agalactiae</i>                 | NGBS061                 | EN72_07800        | MKTKNI IKKTKKKKSNL <b>PF</b> I <b>LL</b> FLI <b>GLS</b> ILLYPVVSR <b>FY</b> YTI <b>ES</b> NNQ <b>TQ</b> DFERAAK <b>LSQ</b>                                                                                                                                                     |
| <i>Streptococcus agalactiae</i>                 | CNCTC 10/84             | W903_1421         | MGG <b>R</b> <b>FQ</b> KNLKKSVVLRNRMNVGLI <b>LL</b> FLV <b>GLL</b> ITSY <b>PF</b> IS <b>NW</b> YNIKANNQVTFNFDNQ <b>TQ</b>                                                                                                                                                      |
| <i>Streptococcus agalactiae</i>                 | CNCTC 10/84             | W903_1422         | MKTKKI IKKTKKKKSNL <b>PF</b> I <b>LL</b> FLI <b>GLS</b> ILLYPVVSR <b>FY</b> YTI <b>ES</b> NNQ <b>TQ</b> DFERAAK <b>LSQ</b>                                                                                                                                                     |
| <i>Streptococcus agalactiae</i>                 | NEM316 (serotype III)   | gbs1475           | MGGK <b>FQ</b> KNLKKSVVLRNRMNVGLI <b>LL</b> FLV <b>GLL</b> ITSY <b>PF</b> IS <b>NW</b> YNIKANNQVTFNFDNQ <b>TQ</b>                                                                                                                                                              |
| <i>Streptococcus agalactiae</i>                 | NEM316 (serotype III)   | gbs1476           | MKTKNIN <b>KK</b> TKKKSNL <b>PF</b> I <b>LL</b> FLI <b>GLS</b> ILLYPVVSR <b>FY</b> YTI <b>ES</b> NNQ <b>TQ</b> DFERAAK <b>LSQ</b>                                                                                                                                              |
| <i>Streptococcus suis</i>                       | 05ZYH33                 | SSU05_2097        | MMKR <b>SQ</b> LRK <b>GI</b> SKQ <b>SI</b> LLK <b>LL</b> FL <b>FL</b> <b>GL</b> VV <b>TL</b> YP <b>WI</b> SQ <b>Y</b> YR <b>Y</b> DS <b>YK</b> I <b>Q</b> S <b>F</b> Y <b>E</b> Q <b>AQ</b> Q <b>LP</b> S <b>E</b>                                                             |
| <i>Streptococcus suis</i>                       | 05ZYH33                 | SSU05_2098        | MI <b>Q</b> KK <b>SG</b> TT <b>KK</b> KK <b>SN</b> IP <b>F</b> Y <b>LV</b> FL <b>IG</b> <b>F</b> G <b>IL</b> LY <b>PH</b> V <b>S</b> N <b>F</b> Y <b>Y</b> R <b>Y</b> ES <b>D</b> Q <b>L</b> T <b>S</b> F <b>D</b> Q <b>E</b> K <b>KT</b> L <b>A</b>                           |
| <i>Streptococcus suis</i>                       | 05ZYH33                 | SSU98_2100        | MMKR <b>SQ</b> LRK <b>GI</b> SKQ <b>SI</b> LLK <b>LL</b> FL <b>FL</b> <b>GL</b> VV <b>TL</b> YP <b>WI</b> SQ <b>Y</b> YR <b>Y</b> DS <b>YK</b> I <b>Q</b> S <b>F</b> Y <b>E</b> Q <b>AQ</b> Q <b>LP</b> S <b>E</b>                                                             |
| <i>Streptococcus suis</i>                       | 05ZYH33                 | SSU98_2101        | MI <b>Q</b> KK <b>SG</b> TT <b>KK</b> KK <b>SN</b> IP <b>F</b> Y <b>LV</b> FL <b>IG</b> <b>F</b> G <b>IL</b> LY <b>PH</b> V <b>S</b> N <b>F</b> Y <b>Y</b> R <b>Y</b> ES <b>D</b> Q <b>L</b> T <b>S</b> F <b>D</b> Q <b>E</b> K <b>KT</b> L <b>A</b>                           |
| <i>Streptococcus suis</i>                       | BM407                   | SSUBM407_1951     | MMKR <b>SQ</b> LRK <b>GI</b> SKQ <b>SI</b> LLK <b>LL</b> FL <b>FL</b> <b>GL</b> VV <b>TL</b> YP <b>WI</b> SQ <b>Y</b> YR <b>Y</b> DS <b>YK</b> I <b>Q</b> S <b>F</b> Y <b>E</b> Q <b>AQ</b> Q <b>LP</b> S <b>E</b>                                                             |
| <i>Streptococcus suis</i>                       | P1/7                    | SSU1882           | MMKR <b>SQ</b> LRK <b>GI</b> SKQ <b>SI</b> LLK <b>LL</b> FL <b>FL</b> <b>GL</b> VV <b>TL</b> YP <b>WI</b> SQ <b>Y</b> YR <b>Y</b> DS <b>YK</b> I <b>Q</b> S <b>F</b> Y <b>E</b> Q <b>AQ</b> Q <b>LP</b> S <b>E</b>                                                             |
| <i>Streptococcus suis</i>                       | P1/7                    | SSU1883           | MI <b>Q</b> KK <b>SG</b> TT <b>KK</b> KK <b>SN</b> IP <b>F</b> Y <b>LV</b> FL <b>IG</b> <b>F</b> G <b>IL</b> LY <b>PH</b> V <b>S</b> N <b>F</b> Y <b>Y</b> R <b>Y</b> ES <b>D</b> Q <b>L</b> T <b>S</b> F <b>D</b> Q <b>E</b> K <b>KT</b> L <b>A</b>                           |
| <i>Streptococcus suis</i>                       | SC84                    | SSUSC84_1903      | MMKR <b>SQ</b> LRK <b>GI</b> SKQ <b>SI</b> LLK <b>LL</b> FL <b>FL</b> <b>GL</b> VV <b>TL</b> YP <b>WI</b> SQ <b>Y</b> YR <b>Y</b> DS <b>YK</b> I <b>Q</b> S <b>F</b> Y <b>E</b> Q <b>AQ</b> Q <b>LP</b> S <b>E</b>                                                             |
| <i>Streptococcus suis</i>                       | SC84                    | SSUSC84_1904      | MI <b>Q</b> KK <b>SG</b> TT <b>KK</b> KK <b>SN</b> IP <b>F</b> Y <b>LV</b> FL <b>IG</b> <b>F</b> G <b>IL</b> LY <b>PH</b> V <b>S</b> N <b>F</b> Y <b>Y</b> R <b>Y</b> ES <b>D</b> Q <b>L</b> T <b>S</b> F <b>D</b> Q <b>E</b> K <b>KT</b> L <b>A</b>                           |
| <i>Streptococcus suis</i>                       | A7                      | SSUA7_1912        | MMKR <b>SQ</b> LRK <b>GI</b> SKQ <b>SI</b> LLK <b>LL</b> FL <b>FL</b> <b>GL</b> VV <b>TL</b> YP <b>WI</b> SQ <b>Y</b> YR <b>Y</b> DS <b>YK</b> I <b>Q</b> S <b>F</b> Y <b>E</b> Q <b>AQ</b> Q <b>LP</b> S <b>E</b>                                                             |
| <i>Streptococcus suis</i>                       | A7                      | SSUA7_1913        | MI <b>Q</b> KK <b>SG</b> TT <b>KK</b> KK <b>SN</b> IP <b>F</b> Y <b>LV</b> FL <b>IG</b> <b>F</b> G <b>IL</b> LY <b>PH</b> V <b>S</b> N <b>F</b> Y <b>Y</b> R <b>Y</b> ES <b>D</b> Q <b>L</b> T <b>S</b> F <b>D</b> Q <b>E</b> K <b>KT</b> L <b>A</b>                           |
| <i>Streptococcus suis</i>                       | GZ1                     | SSGZ1_1904        | MMKR <b>SQ</b> LRK <b>GI</b> SKQ <b>SI</b> LLK <b>LL</b> FL <b>FL</b> <b>GL</b> VV <b>TL</b> YP <b>WI</b> SQ <b>Y</b> YR <b>Y</b> DS <b>YK</b> I <b>Q</b> S <b>F</b> Y <b>E</b> Q <b>AQ</b> Q <b>LP</b> S <b>E</b>                                                             |
| <i>Lactobacillus casei</i>                      | ATCC 334                | LSEI_0457         | MTKRTRRPLGLIDIVIGCLLLAG <b>F</b> GVLCY <b>P</b> FAS <b>D</b> AY <b>V</b> SY <b>Q</b> N <b>Q</b> V <b>I</b> DRYR <b>Q</b> Q <b>E</b> ARK <b>N</b> Q <b>M</b> V <b>L</b>                                                                                                         |
| <i>Streptococcus anginosus</i>                  | SA1                     | DK43_00940        | MK <b>F</b> FN <b>LL</b> T <b>N</b> L <b>T</b> I <b>I</b> A <b>G</b> IL <b>I</b> IS <b>Y</b> P <b>IS</b> Q <b>I</b> Y <b>Y</b> N <b>Y</b> Q <b>T</b> K <b>E</b> V <b>K</b> D <b>F</b> SS <b>A</b> Q <b>L</b> T <b>S</b> E <b>D</b> V <b>T</b> E <b>R</b> I <b>K</b> L <b>A</b> |
| <i>Streptococcus equi subsp. zooepidemicus</i>  | H70                     | SZO_18280         | MVKNNSAI <b>KK</b> Q <b>S</b> FL <b>T</b> GF <b>V</b> FP <b>LL</b> FL <b>GL</b> L <b>I</b> AS <b>Y</b> PL <b>LS</b> H <b>Y</b> Y <b>R</b> V <b>Q</b> N <b>R</b> AV <b>Q</b> AF <b>E</b> TAK <b>R</b> Q <b>V</b> D <b>S</b>                                                     |
| <i>Streptococcus suis</i>                       | SC070731                | NJAUSS_1931       | MI <b>Q</b> KK <b>SG</b> TT <b>KK</b> KK <b>SN</b> IP <b>F</b> Y <b>LV</b> FL <b>IG</b> <b>F</b> G <b>IL</b> LY <b>PH</b> V <b>S</b> N <b>F</b> Y <b>Y</b> R <b>Y</b> ES <b>D</b> Q <b>L</b> T <b>S</b> F <b>D</b> Q <b>E</b> K <b>KT</b> L <b>A</b>                           |
| <i>Streptococcus suis</i>                       | SC070731                | NJAUSS_1930       | MK <b>LL</b> FL <b>GL</b> VV <b>TL</b> YP <b>WI</b> SQ <b>Y</b> YR <b>Y</b> DS <b>YK</b> I <b>Q</b> S <b>F</b> Y <b>E</b> Q <b>AQ</b> Q <b>LP</b> S <b>E</b> EV <b>L</b> K <b>R</b> L <b>E</b> HAR <b>A</b> Y <b>N</b> Q <b>T</b> L <b>E</b>                                   |
| <i>Streptococcus suis</i>                       | S735                    | YYK_09080         | MI <b>Q</b> KK <b>SG</b> TT <b>KK</b> KK <b>SN</b> IP <b>F</b> Y <b>LV</b> FL <b>IG</b> <b>F</b> G <b>IL</b> LY <b>PH</b> V <b>S</b> N <b>F</b> Y <b>Y</b> R <b>Y</b> ES <b>D</b> Q <b>L</b> T <b>S</b> F <b>D</b> Q <b>E</b> K <b>KT</b> L <b>A</b>                           |
| <i>Streptococcus suis</i>                       | S735                    | YYK_09075         | MMKR <b>SQ</b> LRK <b>GI</b> SKQ <b>SI</b> LLK <b>LL</b> FL <b>FL</b> <b>GL</b> VV <b>TL</b> YP <b>WI</b> SQ <b>Y</b> YR <b>Y</b> DS <b>YK</b> I <b>Q</b> S <b>F</b> Y <b>E</b> Q <b>AQ</b> Q <b>LP</b> S <b>E</b>                                                             |
| <i>Streptococcus suis</i>                       | JS14                    | SSUJS14_2054      | MI <b>Q</b> KK <b>SG</b> TT <b>KK</b> KK <b>SN</b> IP <b>F</b> Y <b>LV</b> FL <b>IG</b> <b>F</b> G <b>IL</b> LY <b>PH</b> V <b>S</b> N <b>F</b> Y <b>Y</b> R <b>Y</b> ES <b>D</b> Q <b>L</b> T <b>S</b> F <b>D</b> Q <b>E</b> K <b>KT</b> L <b>A</b>                           |
| <i>Streptococcus suis</i>                       | JS14                    | SSUJS14_2053      | MMKR <b>SQ</b> LRK <b>GI</b> SKQ <b>SI</b> LLK <b>LL</b> FL <b>FL</b> <b>GL</b> VV <b>TL</b> YP <b>WI</b> SQ <b>Y</b> YR <b>Y</b> DS <b>YK</b> I <b>Q</b> S <b>F</b> Y <b>E</b> Q <b>AQ</b> Q <b>LP</b> S <b>E</b>                                                             |
| <i>Lactobacillus casei</i>                      | BL23                    | LCABL_05230       | MTKRTRRPLGLIDIVIGCLLLAG <b>F</b> GVLCY <b>P</b> FAS <b>D</b> AY <b>V</b> SY <b>Q</b> N <b>Q</b> V <b>I</b> DRYR <b>Q</b> Q <b>E</b> ARK <b>N</b> Q <b>M</b> V <b>L</b>                                                                                                         |
| <i>Lactobacillus casei</i>                      | Zhang                   | LCAZH_0487        | MTKRTRRPLGLIDIVIGCLLLAG <b>F</b> GVLCY <b>P</b> FAS <b>D</b> AY <b>V</b> SY <b>Q</b> N <b>Q</b> V <b>I</b> DRYR <b>Q</b> Q <b>E</b> ARK <b>N</b> Q <b>M</b> V <b>L</b>                                                                                                         |
| <i>Lactobacillus casei</i>                      | BD-II                   | LCBD_0521         | MTKRTRRPLGLIDIVIGCLLLAG <b>F</b> GVLCY <b>P</b> FAS <b>D</b> AY <b>V</b> SY <b>Q</b> N <b>Q</b> V <b>I</b> DRYR <b>Q</b> Q <b>E</b> ARK <b>N</b> Q <b>M</b> V <b>L</b>                                                                                                         |
| <i>Lactobacillus casei</i>                      | LC2W                    | LC2W_0523         | MTKRTRRPLGLIDIVIGCLLLAG <b>F</b> GVLCY <b>P</b> FAS <b>D</b> AY <b>V</b> SY <b>Q</b> N <b>Q</b> V <b>I</b> DRYR <b>Q</b> Q <b>E</b> ARK <b>N</b> Q <b>M</b> V <b>L</b>                                                                                                         |
| <i>Lactobacillus casei</i>                      | LOCK919                 | LOCK919_0549      | MTKRTRRPLGLIDIVIGCLLLAG <b>F</b> GVLCY <b>P</b> FAS <b>D</b> AY <b>V</b> SY <b>Q</b> N <b>Q</b> V <b>I</b> DRYR <b>Q</b> Q <b>E</b> ARK <b>N</b> Q <b>M</b> V <b>L</b>                                                                                                         |
| <i>Lactobacillus casei</i>                      | LOCK919                 | LOCK919_p16       | MTKRTRRPLGLIDIVIGCLLLAG <b>F</b> GVLCY <b>P</b> FAS <b>D</b> AY <b>V</b> SY <b>Q</b> N <b>Q</b> V <b>I</b> DRYR <b>Q</b> Q <b>E</b> ARK <b>N</b> Q <b>M</b> V <b>L</b>                                                                                                         |
| <i>Lactobacillus casei</i>                      | 12A                     | LCA12A_2465       | MTKRTRRPLGLIDIVIGCLLLAG <b>F</b> GVLCY <b>P</b> FAS <b>D</b> AY <b>V</b> SY <b>Q</b> N <b>Q</b> V <b>I</b> DRYR <b>Q</b> Q <b>E</b> ARK <b>N</b> Q <b>M</b> V <b>L</b>                                                                                                         |
| <i>Lactobacillus rhamnosus</i>                  | GG                      | LGG_00441         | MTKRTRRPLGLIDIVIGCLLLAG <b>F</b> GVLCY <b>P</b> FAS <b>D</b> AY <b>V</b> SY <b>Q</b> N <b>Q</b> V <b>I</b> DRYR <b>Q</b> Q <b>E</b> ARK <b>N</b> Q <b>M</b> V <b>L</b>                                                                                                         |
| <i>Lactobacillus rhamnosus</i>                  | GG                      | LRHM_0425         | MTKRTRRPLGLIDIVIGCLLLAG <b>F</b> GVLCY <b>P</b> FAS <b>D</b> AY <b>V</b> SY <b>Q</b> N <b>Q</b> V <b>I</b> DRYR <b>Q</b> Q <b>E</b> ARK <b>N</b> Q <b>M</b> V <b>L</b>                                                                                                         |
| <i>Lactobacillus paracasei subsp. paracasei</i> | 8700 2                  | LBPG_02641        | MTKRTRRPLGLIDIVIGCLLLAG <b>F</b> GVLCY <b>P</b> FAS <b>D</b> AY <b>V</b> SY <b>Q</b> N <b>Q</b> V <b>I</b> DRYR <b>Q</b> Q <b>E</b> ARK <b>N</b> Q <b>M</b> V <b>L</b>                                                                                                         |
| <i>Lactobacillus paracasei</i>                  | N1115                   | AF91_01535        | MTKRTRRPLGLIDIVIGCLLLAG <b>F</b> GVLCY <b>P</b> FAS <b>D</b> AY <b>V</b> SY <b>Q</b> N <b>Q</b> V <b>I</b> DRYR <b>Q</b> Q <b>E</b> ARK <b>N</b> Q <b>M</b> V <b>L</b>                                                                                                         |

|                                 |            |             |                                                                 |
|---------------------------------|------------|-------------|-----------------------------------------------------------------|
| <i>Clostridium novyi</i>        | -          | NT01CX_0210 | MIKKRISIVIFIGILIFIYPKISELYYTNKQKRIIRKYDNLIEKFNKTKKQIENKDI       |
| <i>Coprococcus catus</i>        | -          | CC1_21250   | MRKLIKLIGLFMVFFIGVLYPAVSDIYTKYRTNESIEEFYQKYQIDETESEKKSTDSE      |
| <i>Macrococcus caseolyticus</i> | JCSC5402   | MCCL_0366   | MKPEKKTKNRISNVI FGLIFFAGFSILYPMISAVVYDYEASNEVDFNKEVELLSDQQ      |
| <i>Streptococcus suis</i>       | GZ1        | SSGZ1_1905  | MIQKKS GKTTK KKKSNIPFYL VFLIGFGILLYPHVSNFY YRYESDQLTNSFDQEKKTLA |
| <i>Fingoldia magna</i>          | ATCC 29328 | FMG_0189    | MWKKIKHN FVFLIFLLGF GVMMPVISRLY YRVDSANQVKEFDKAVKGLSKEELAKRLA   |
| <i>Fingoldia magna</i>          | ATCC 29328 | FMG_0190    | MKSKLKENLKYVLI FLVGF AVAMYPLISRLYR IEANSEVHDFDTNAKMDKKEIDRRRI   |
| <i>Eubacterium limosum</i>      | KIST612    | ELI_4237    | MIILVFLLGVLIMGYPPFSNWNQILQNRLITEYNI SSEALTPEDKDAEYNKREYNQNL     |
| <i>Coriobacterium glomerans</i> | PW2        | Corgl_0469  | MAKRRKGR LFASIIAALVFFVGVGCILYPYVSDWYQKYLQSKVIRNQEI IQEKDRSSLE   |
| <i>Trueperella pyogenes</i>     | TP8        | X956_01065  | MGVVLVGLALIPVVS THYNNYKQREFALKYGNNVQNI DTSEREALEAREY NKRLPG     |
| <i>Trueperella pyogenes</i>     | TP6375     | CQ11_06630  | MNPDQTPAPT PRRSNRRATIAIGVLLGILALIPVVS THYNNYKQREFALKYGNNVQNI    |

## Panel B

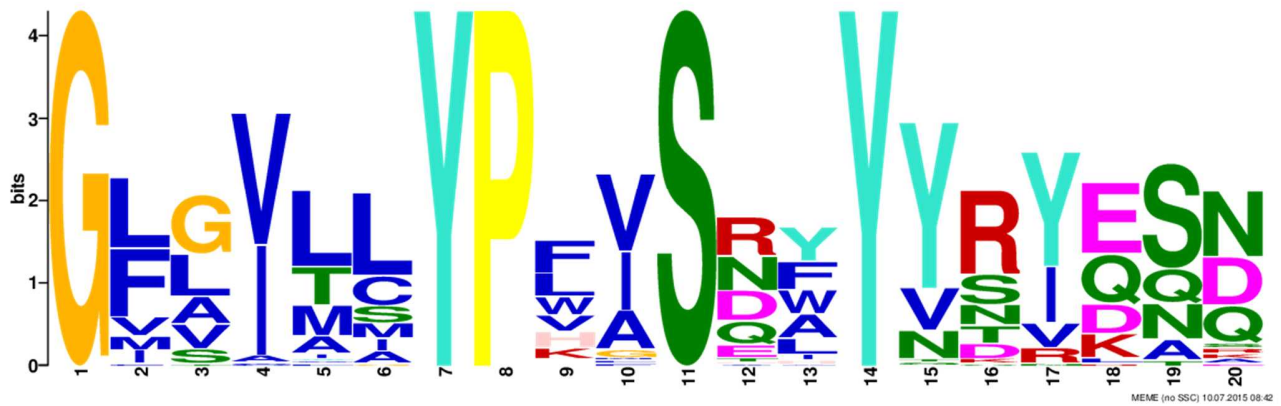

Supplement: pone.0153373.s001.pdf [file pone.0153373.s001.pdf]
